# Supplementary material for: Titanium alkoxide induced BiOBr–Bi2WO6 mesoporous nanosheet composites with much enhanced photocatalytic activity
Source: Royal Society of Chemistry journal article supplement (doi:10.1039/c3ta10940b), 2013-01-01
Supplement: c3ta10940b.pdf [file c3ta10940b.pdf]

# Titanium Alkoxide Induced BiOBr-Bi<sub>2</sub>WO<sub>6</sub> Mesoporous Nanosheet Composites with Much Enhanced Photocatalytic Activity

5 Yongli Li,<sup>a,b</sup> Yuanming Liu,<sup>c</sup> Jinshu Wang,<sup>\*a</sup> Evan Uchaker,<sup>b</sup> Qifeng Zhang,<sup>b</sup> Shibing Sun,<sup>a</sup>  
Yunxia Huang,<sup>b</sup> Jiangyu Li,<sup>c</sup> and Guozhong Cao<sup>\*b</sup>

<sup>a</sup> School of Materials Science and Engineering, Beijing University of Technology, Beijing 100124, China. E-  
10 mail: lybjut@gmail.com

<sup>b</sup> Department of Materials Science and Engineering, University of Washington, Seattle, Washington 98195-  
2120, USA.

<sup>c</sup> Department of Mechanical Engineering, University of Washington, Seattle, Washington 98195-2600, USA

\*Corresponding Author. Guozong Cao. Tel: +1-206-616-9084; Fax: +1-206-543-3100; E-mail address:  
15 gzcao@u.washington.edu. Jinshu Wang. Tel: +86-67391101; Fax: +86-67391101; E-mail address:  
wangjsh@bjut.edu.cn.

## Supplementary Information

20

25

30

35

40

45

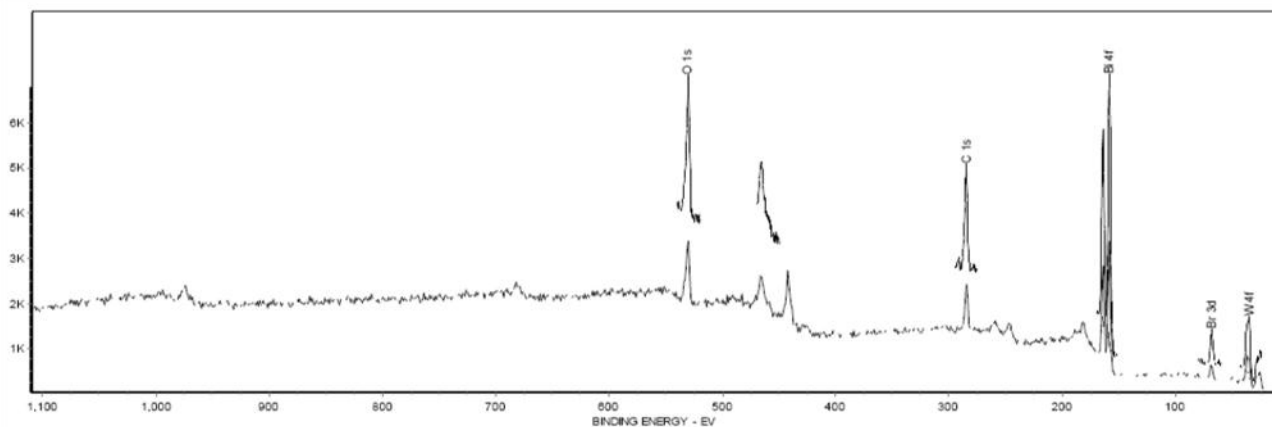

Figure S1. Typical XPS analysis from the BiOBr-Bi<sub>2</sub>WO<sub>6</sub> MNCs.

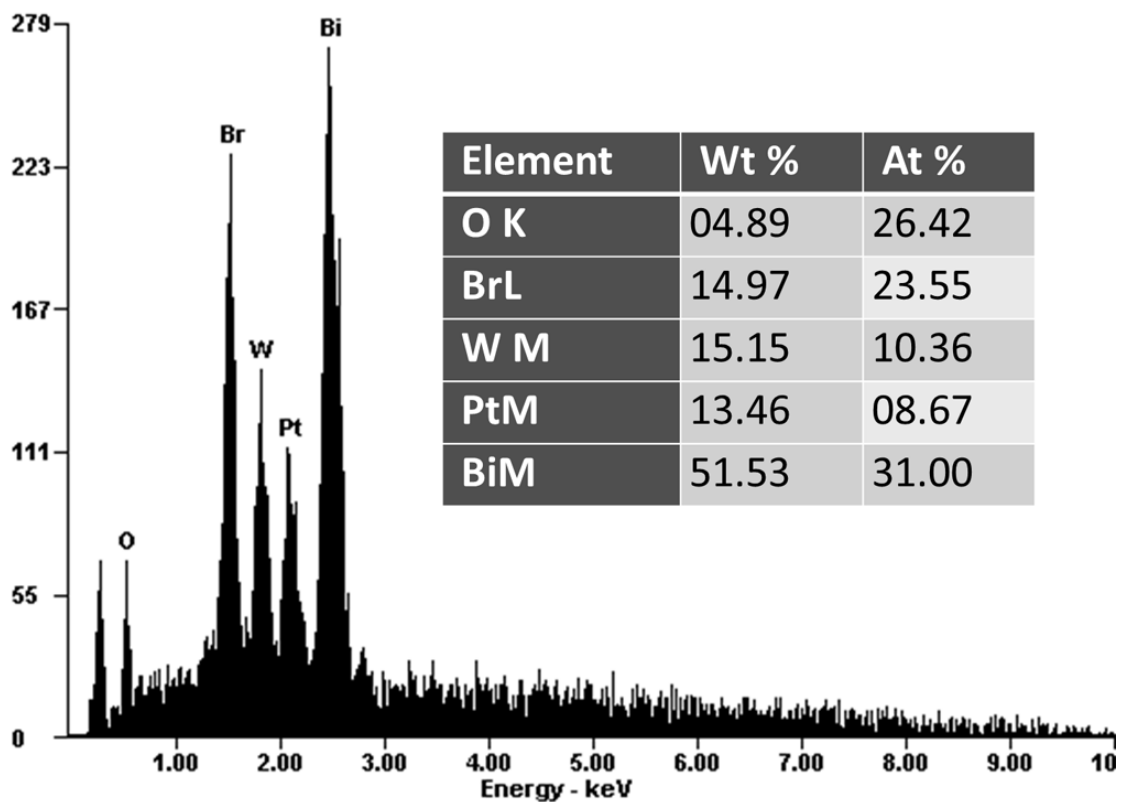

Figure S2. EDS analysis of BiOBr-Bi<sub>2</sub>WO<sub>6</sub> MNCs.

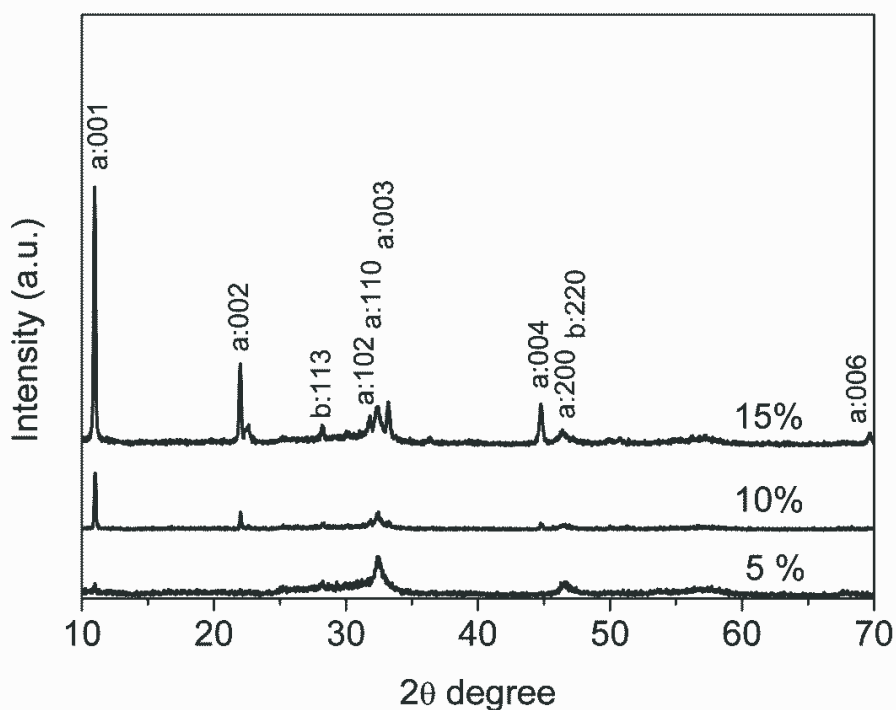

**Figure S3.** XRD patterns of BiOBr-Bi<sub>2</sub>WO<sub>6</sub> MNCs with different fraction of Ti(O<sup>i</sup>Pr)<sub>4</sub>.  
a: BiOBr, b: Bi<sub>2</sub>WO<sub>6</sub>

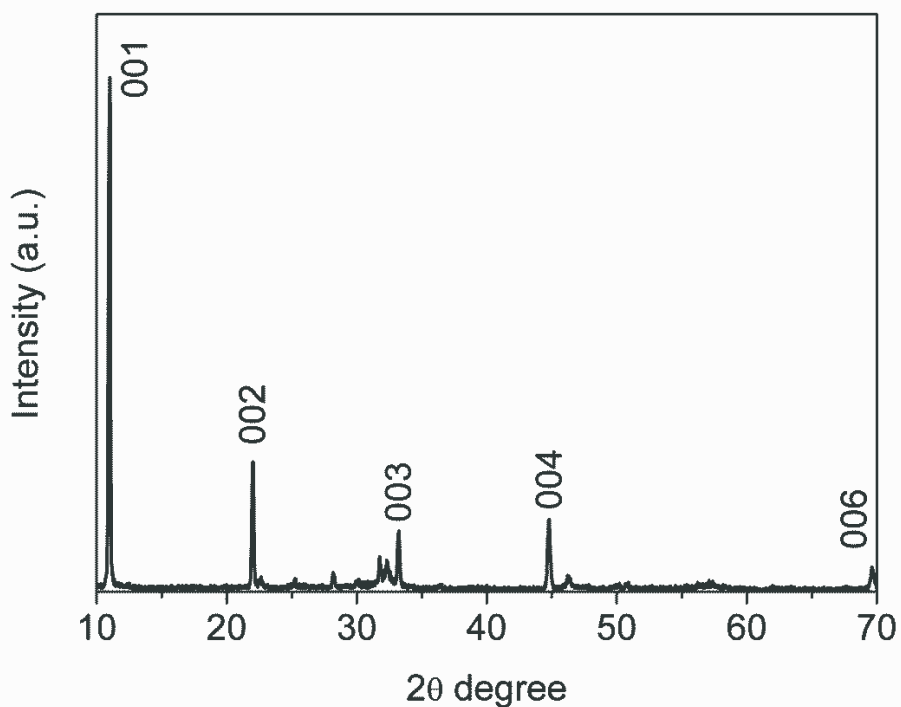

**Figure S4.** XRD pattern of BiOBr-Bi<sub>2</sub>WO<sub>6</sub> MNCs with Ti(OBu)<sub>4</sub> as Ti source.

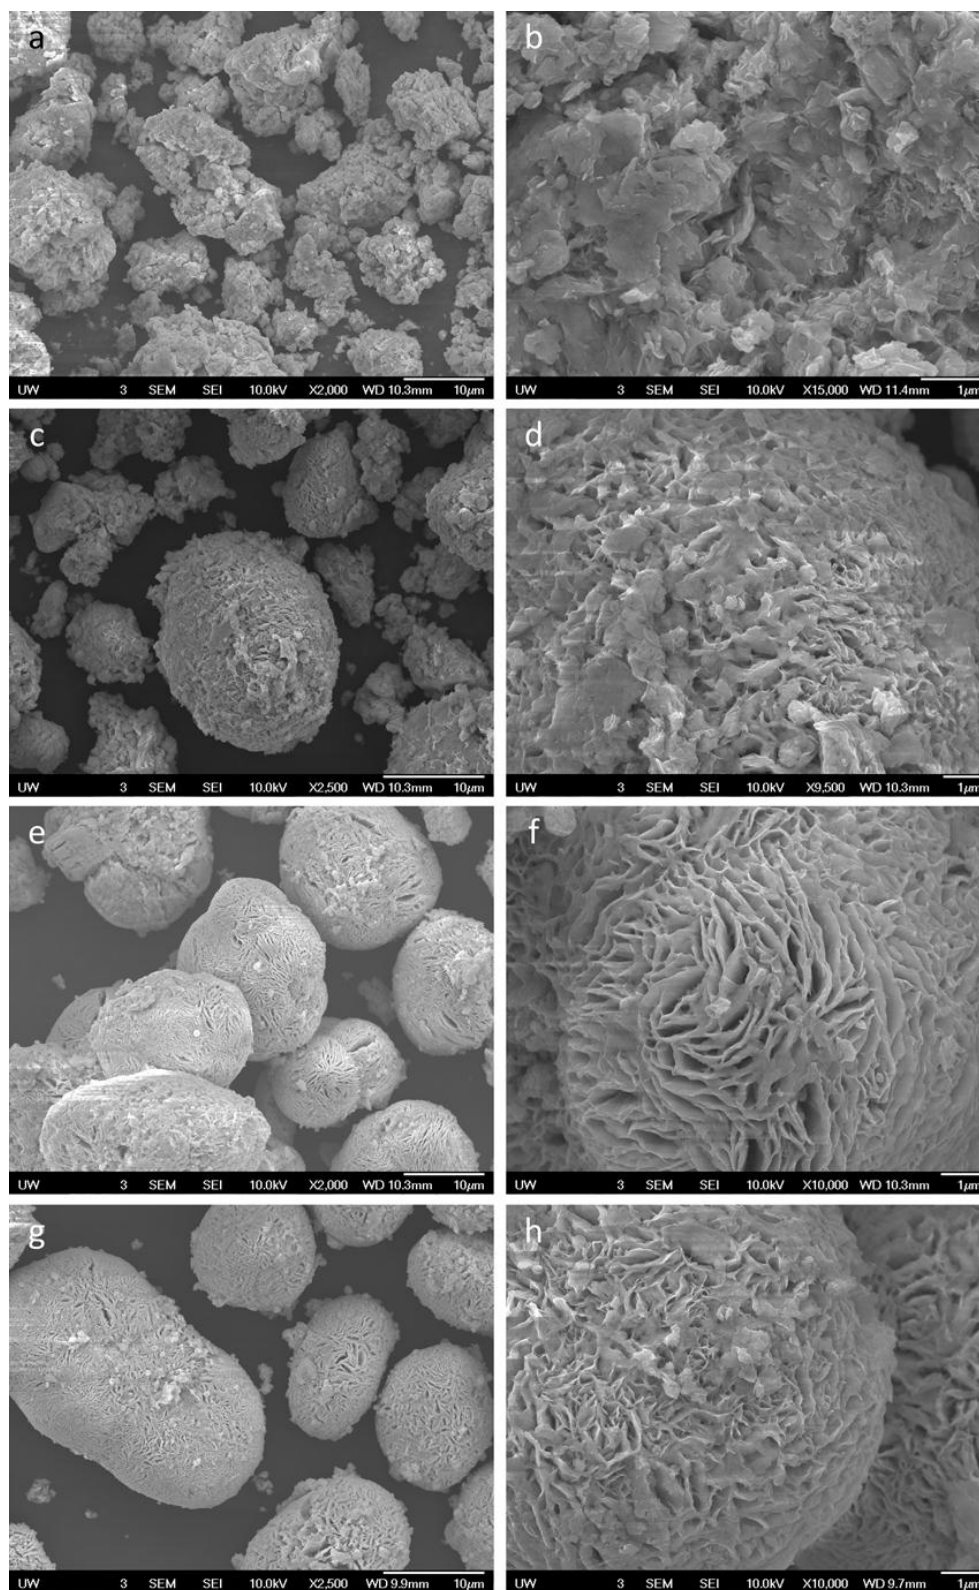

**Figure S5.** The morphology evolution of  $\text{BiOBr-Bi}_2\text{WO}_6$  MNCs different fraction of  $\text{Ti}(\text{O}^i\text{Pr})_4$ . (a, b) 0 mol%, (c, d) 5 mol%, (e, f) 10 mol% and (g, h) 15 mol% against Bi, showing the formation of assembled nanosheets to a microsphere involved  $\text{Ti}(\text{O}^i\text{Pr})_4$ .

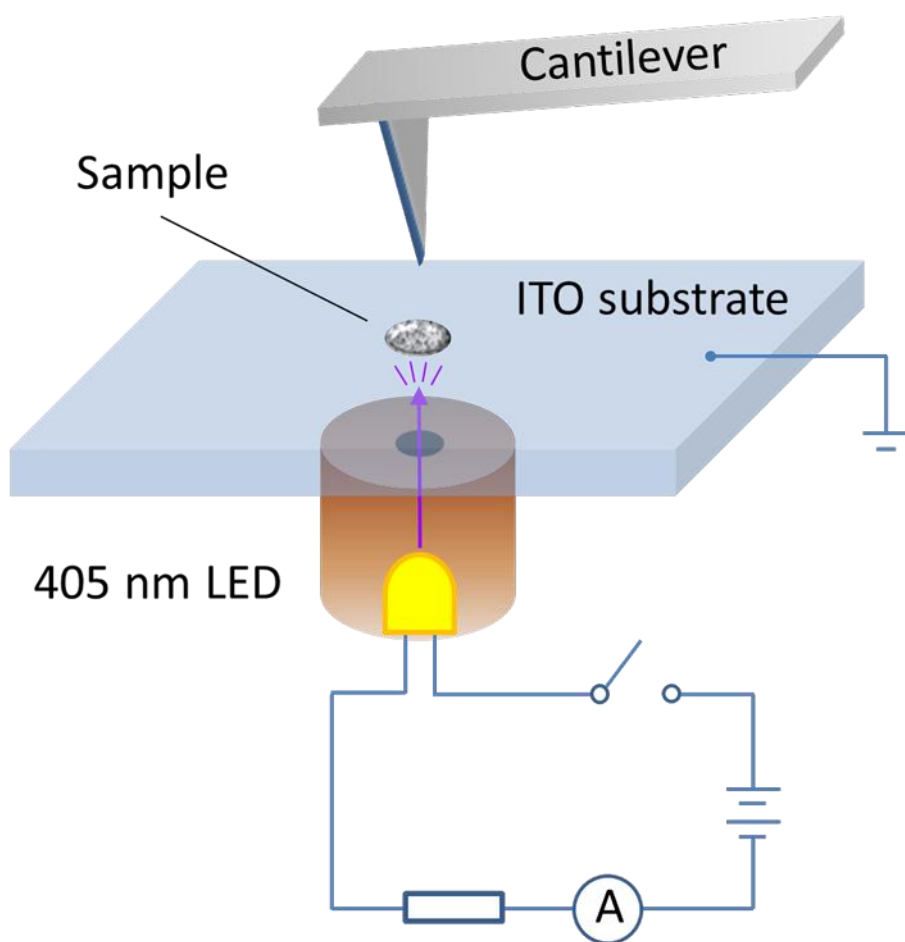

**Figure S6.** Schematics of the KPFM measurement for photoinduced surface potential.

5

10

15

20

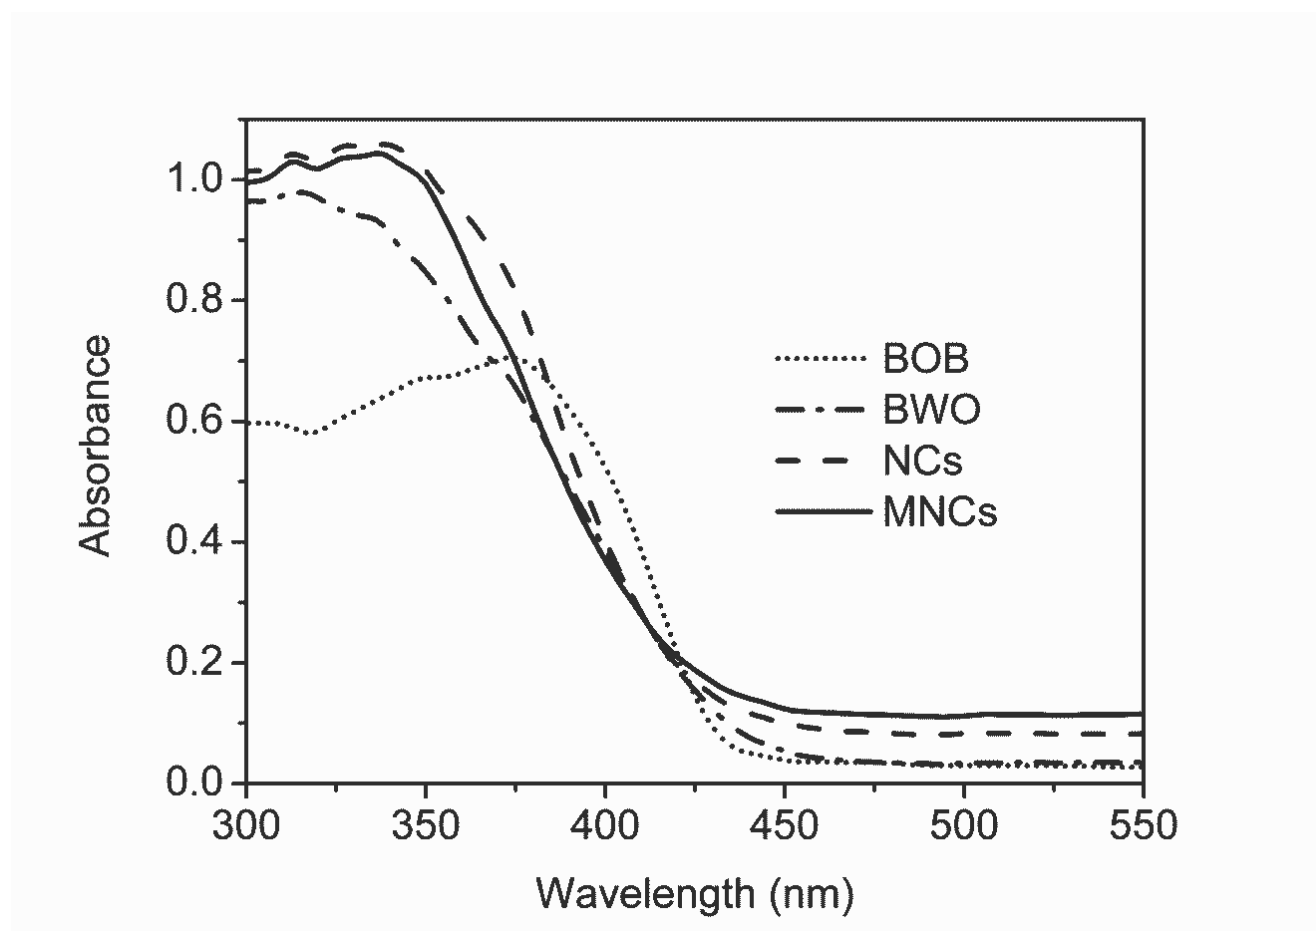

**Figure S7.** UV-vis spectra of BiOBr (BOB), Bi<sub>2</sub>WO<sub>6</sub> (BWO), NCs and MNCs of BiOBr-Bi<sub>2</sub>WO<sub>6</sub>.

5

10

15

20

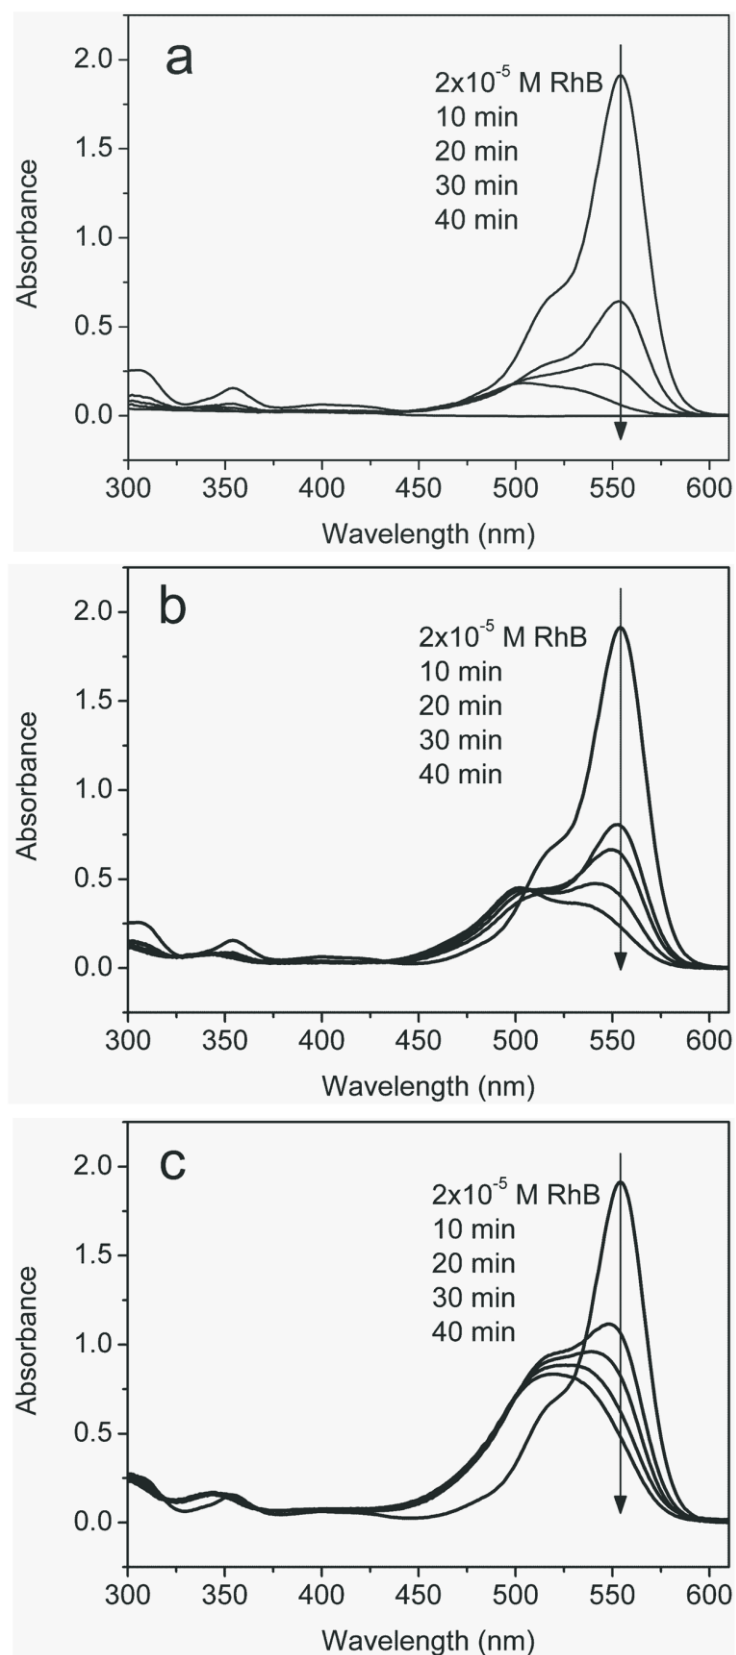

**Figure S8.** UV-vis spectral variations of RhB aqueous solution after degradation over the materials. (a) MNCs, (b) NCs and (c) BiOBr under visible light irradiation.

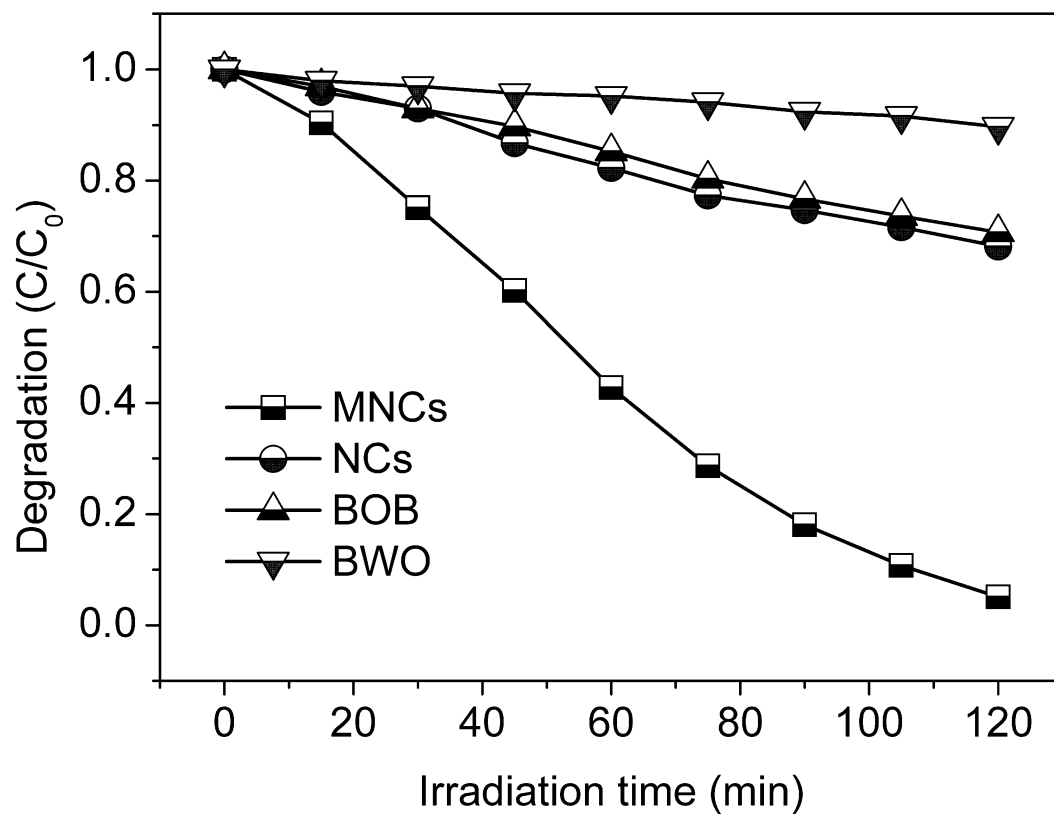

**Figure S9.** Photodegradation of MO in the presence of MNCs and NCs of BiOBr-Bi<sub>2</sub>WO<sub>6</sub>, BiOBr (BOB) and Bi<sub>2</sub>WO<sub>6</sub> (BWO) under exposure to visible light.

5

10

15
